# Supplementary material
Source: PubMed Central journal article supplement (PMC8562907)
Supplement: NIHMS1708950-supplement-1.pdf [file NIHMS1708950-supplement-1.pdf]

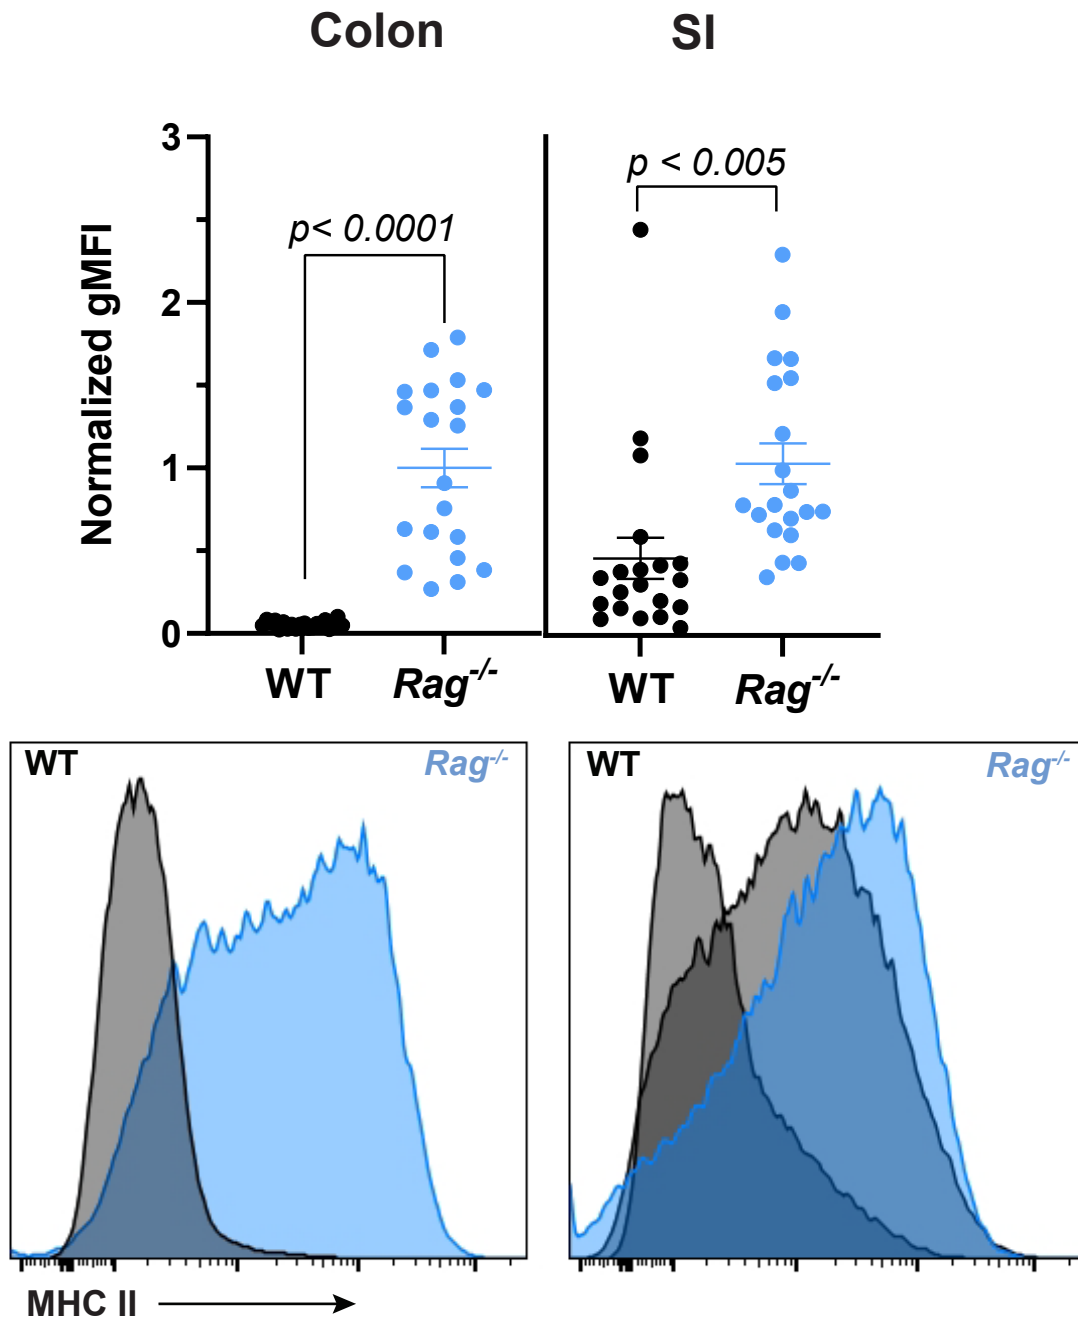

**Supplemental Figure 1: Variable MHC II expression on enterocytes from WT mice.** MHCII expression on Epcam<sup>+</sup> colonic and small intestinal enterocytes in in house WT and *Rag1*<sup>-/-</sup> mice to highlight the sporadic upregulation occasionally observed in WT SIs. In house *Rag1*<sup>-/-</sup> consistently have high MHCII expression and serve as positive controls. gMFI was normalized to the *Rag1*<sup>-/-</sup> experimental average (to account for variability in MHCII staining intensity between experiments). Each mouse represents an individual data point and summarizes 5 independent experiments with 2-4 mice per genotype in each. Statistical significance is shown on the graph and was determined by unpaired t-test.

Colon

SI

b)

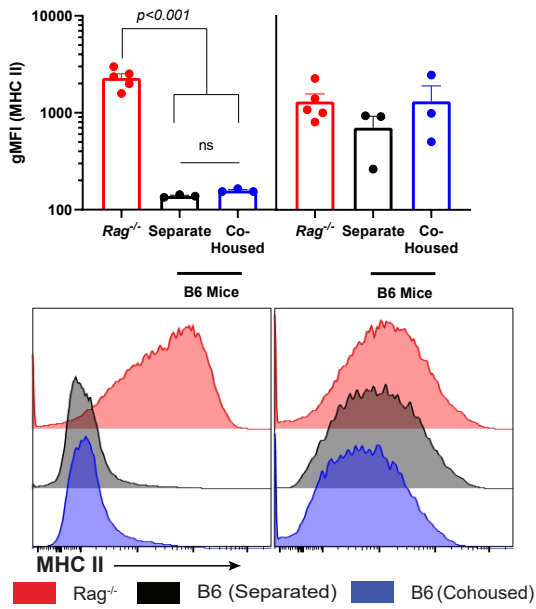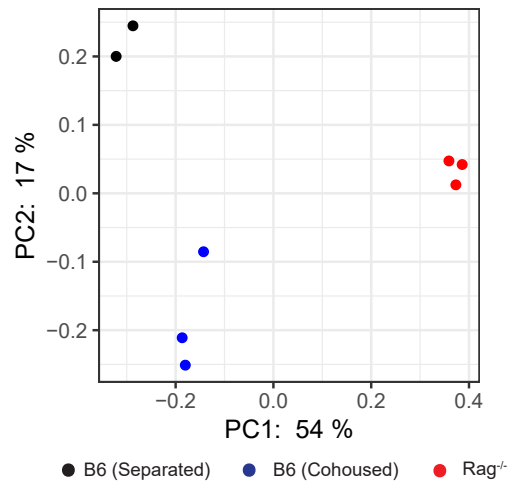

c)

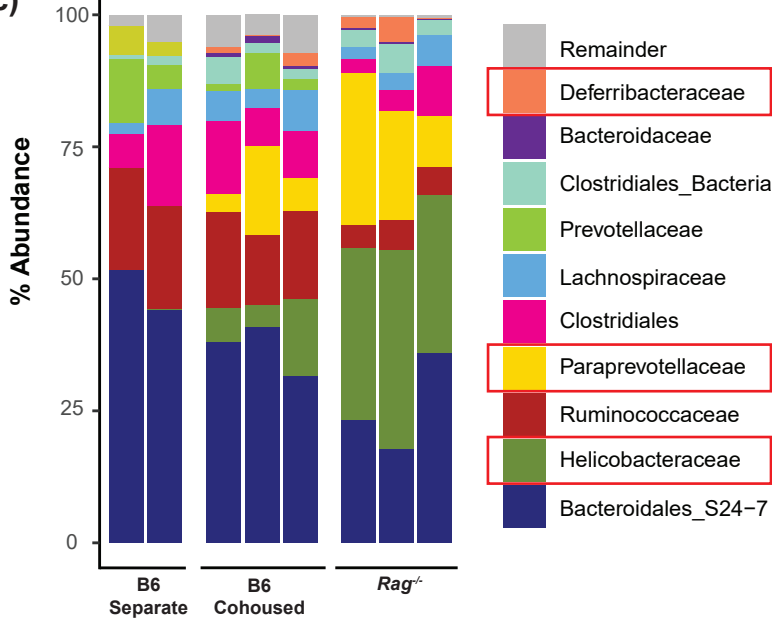

d)

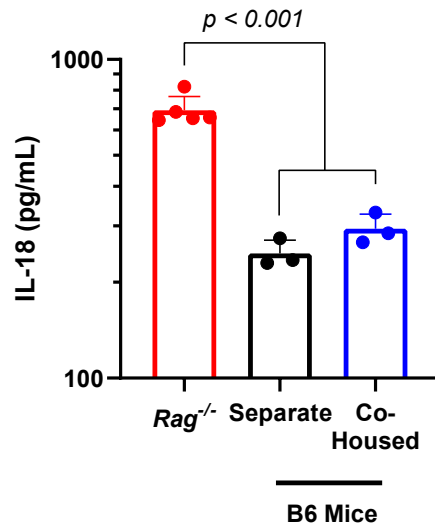

**Supplemental Figure 2: Wild-type mice do not upregulate colonic IEC MHCII nor serum IL-18 upon co-housing with locally-bred *Rag1*<sup>-/-</sup> mice.** WT (C57Bl/6J) and *Rag1*<sup>-/-</sup> mice were kept isolated or cohoused for 5 weeks and analyzed for epithelial MHCII expression (a). Each dot represents a single mouse and is representative of 2 independent experiments with 3-5 mice per housing condition. To assess alterations in microbial diversity following cohousing cecal stool was collected and genomic DNA isolated for 16S analysis. Jaccard principal coordinate analysis plots of cecal fecal diversity (b) and family diversity (c), for each mouse. Serum IL-18 at sacrifice (d). gMFI=geometric mean fluorescent intensity, PC=Principal Coordinate.

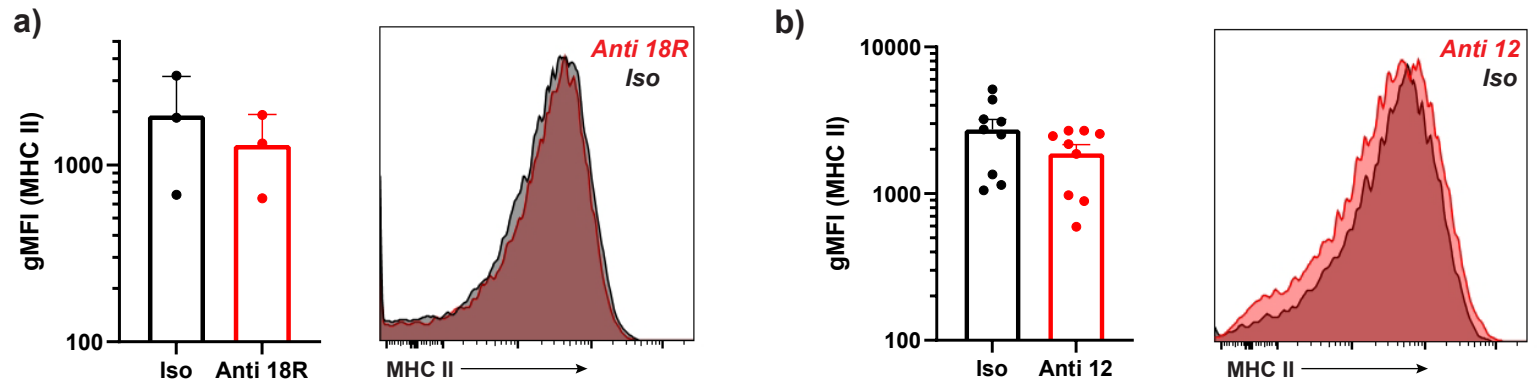

## Nlrc4 Mice

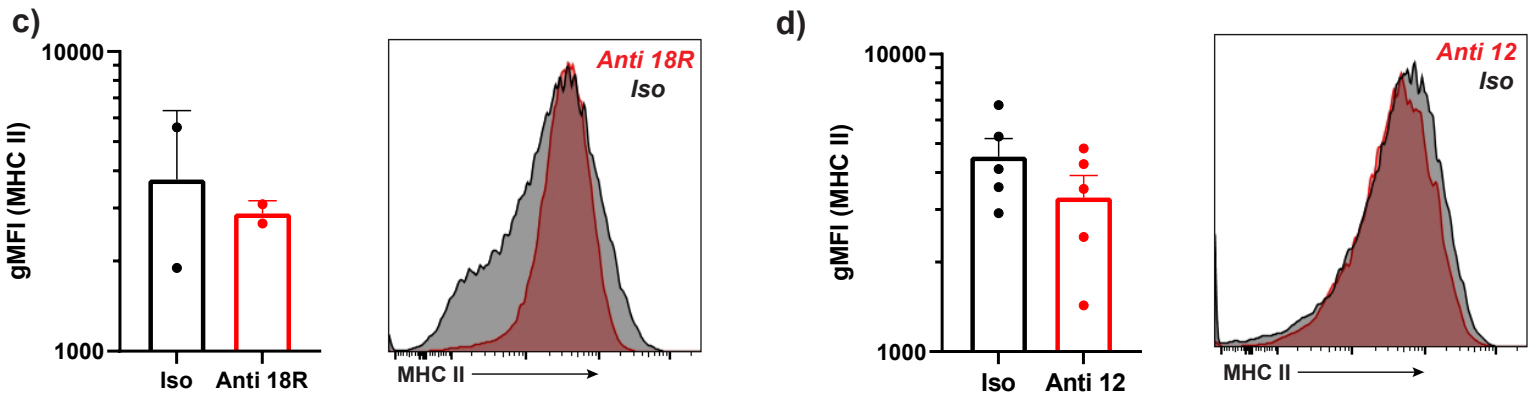

**Supplemental Figure 3: Insensitivity of murine SI IEC MHCII to systemic IL-18 and IL-12 blockade.** gMFI and representative histograms of MHCII expression on Epcam<sup>+</sup> SI IECs. *Rag1*<sup>-/-</sup> and *Nlrc4*<sup>TS/TS</sup> mice were injected i.p. every three days with IL-18R (a, c) or IL-12 (b, d) blocking antibodies or isotype controls and analyzed 15 days post treatment initiation for IEC MHCII expression. Figures are representative of n=2 experiments (a, d) with 3-5 mice per treatment, the combined result of n=2 experiments with 4-5 mice per treatment or of a single experiment with n= 2 mice (c). All results were deemed non-significant by unpaired T test.

**Rag Mice**

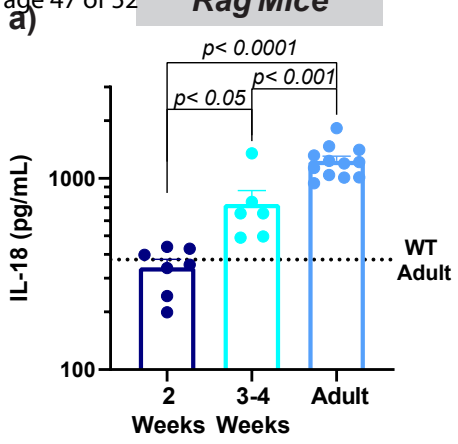

**b)**

**Rag Mice**

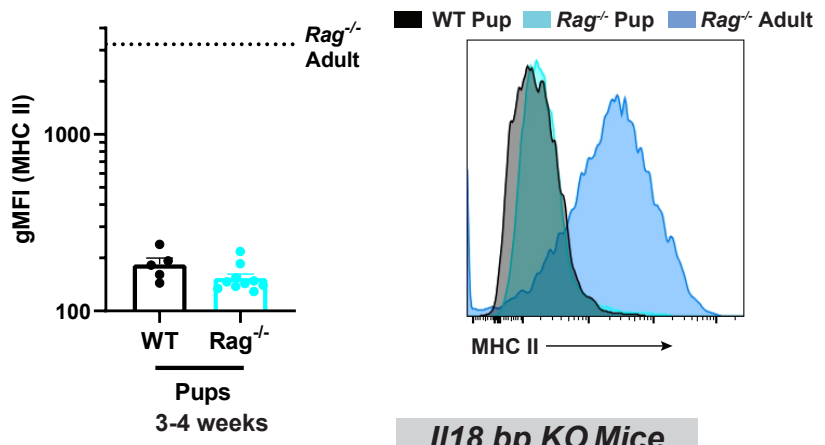

**Nlrc4 Mice**

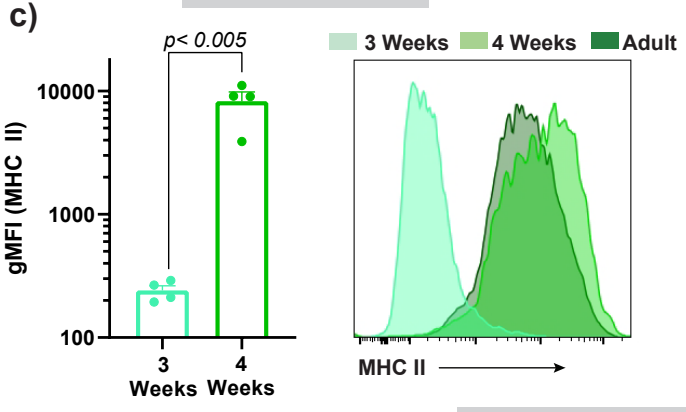

**Il18 bp KO Mice**

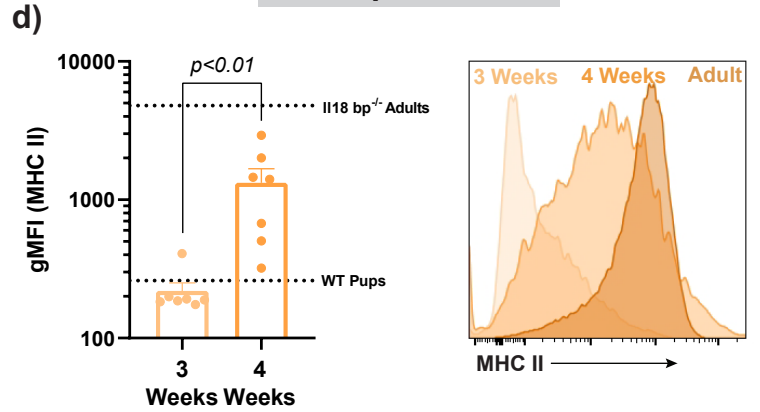

**CpG Mice**

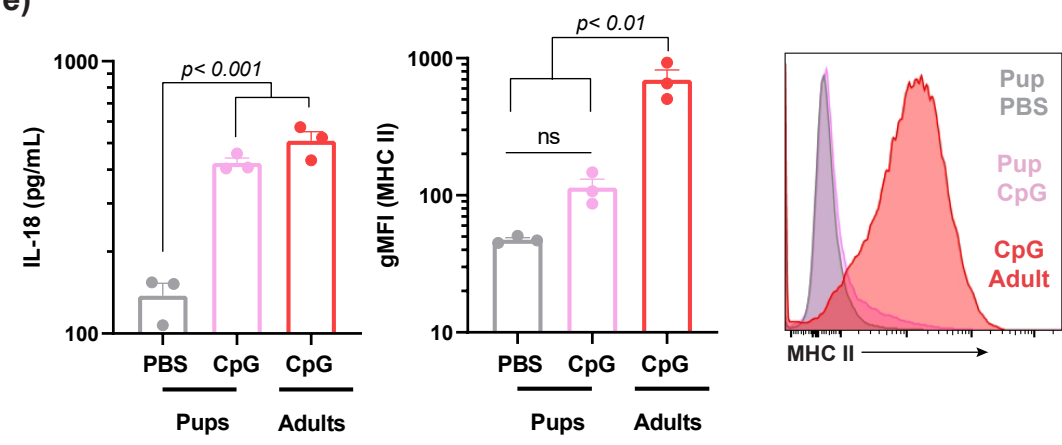

**f)**

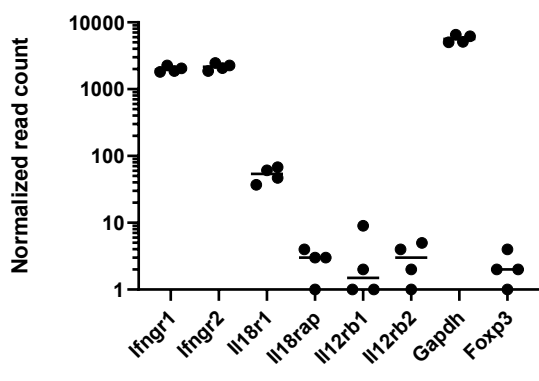

**Supplemental Figure 4: MHCII induction is age dependent.** Time course of small intestinal (SI) epithelial MHCII expression and serum IL-18 by age. Serum IL-18 (a) and MHCII expression (b) in 3-4 week old  $Rag1^{-/-}$  pups vs adults. SI MHCII in  $NLRC4^{TS/TS}$  (c) and IL18BP knockouts pups (d). Five-day old pups and adults were injected daily with CpG (ip), sacrificed 5 days post treatment initiation, and analyzed for SI MHC II and serum IL-18 (e). Normalized read counts from bulk RNA-seq of FACS-sorted IECs from neonatal intestine derived from mice four hours after subcutaneous injection of saline [PMID: 32847859]. *Gapdh* and *Foxp3* are included as positive and negative controls, respectively. Figures b and e are representative of two independent experiments with 2-4 mice per experimental group. Figures a, c and d show combined data from two independent experiments with each mouse denoted by a single datapoint. Statistical significance is shown on each graph and was determined by unpaired t-test ( $n = 2$  groups) or one-way ANOVA ( $n = 3$  groups).

a)

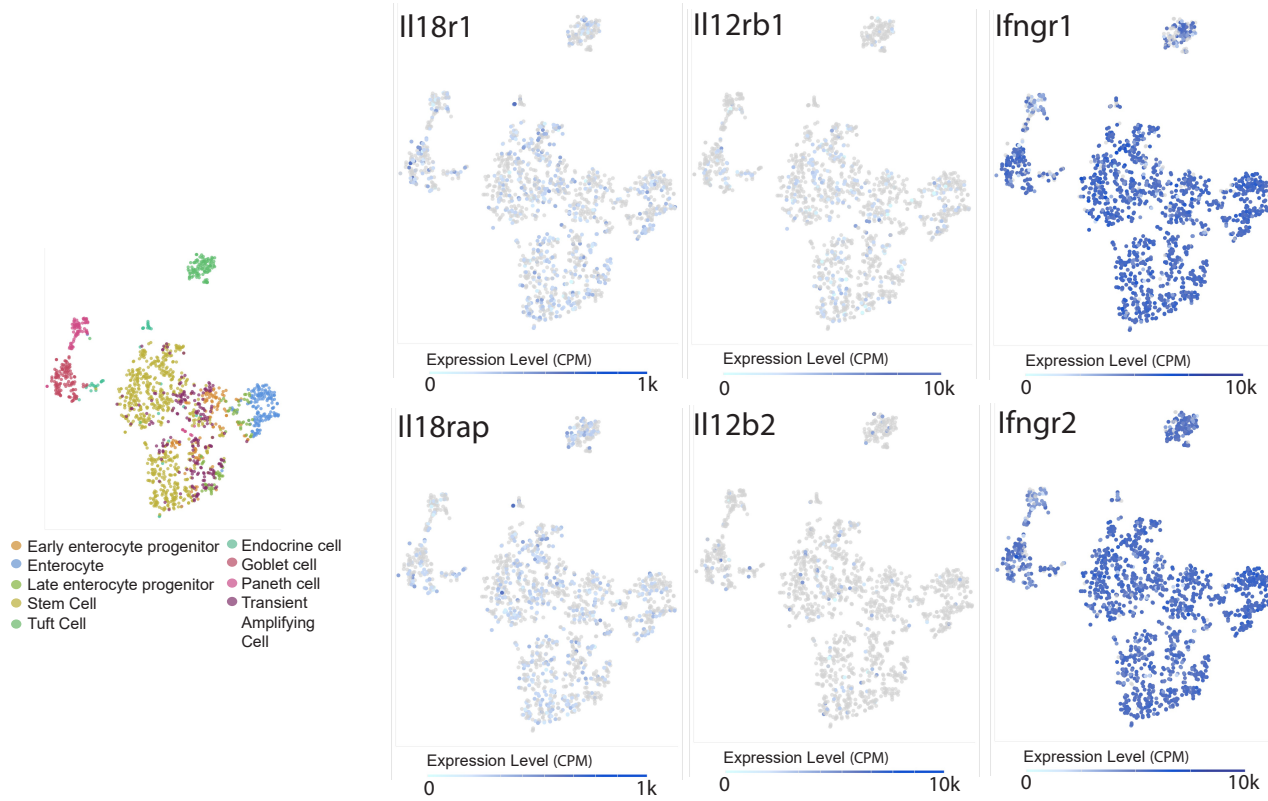

b)

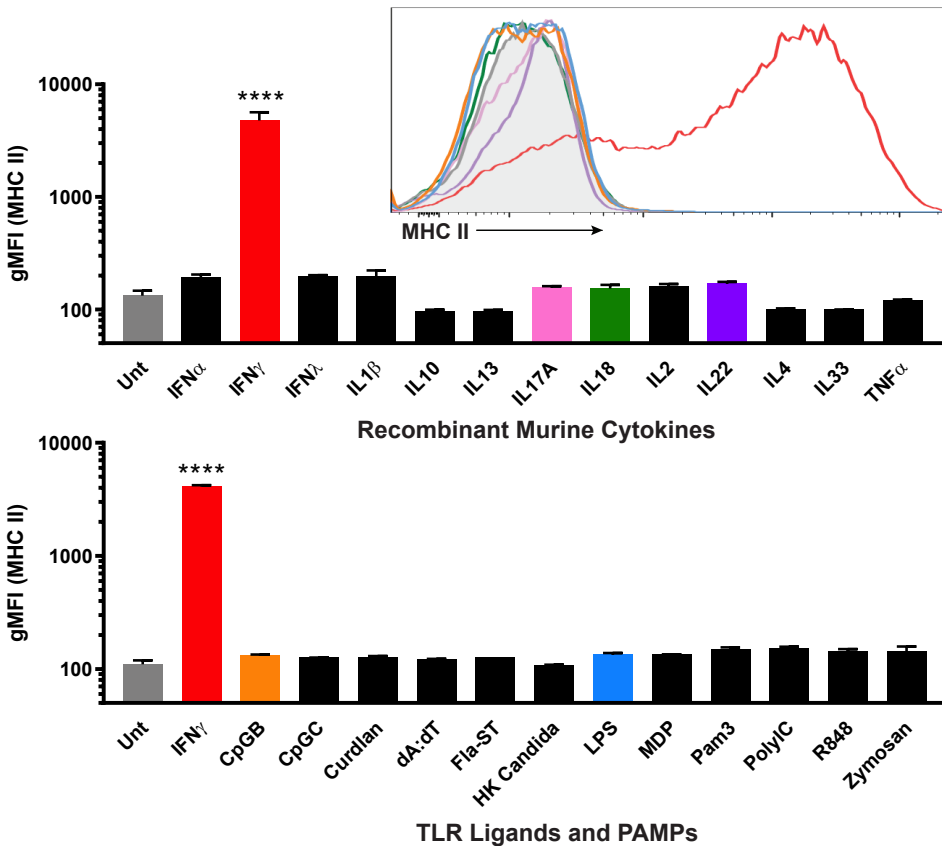

c)

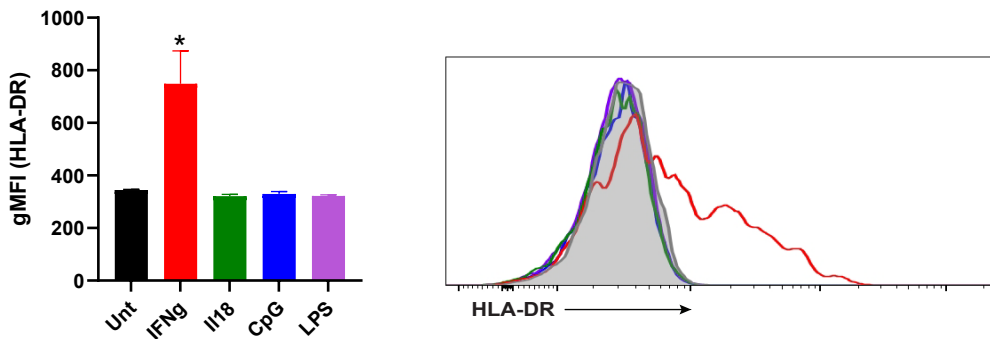

### Supplemental Figure 5: IFN $\gamma$ is a unique and potent driver of IEC MHCII expression in vitro.

t-SNE plot (perplexity=25) colored by inferred cell type or gene expression of select murine cytokine receptors from Haber et al [PMID: 29144463] visualized in Single Cell Expression Atlas (a). WT B6 small intestinal organoids (b) or human small intestinal enteroids (c) were treated for 3.5 days with recombinant cytokines, TLR ligands, and pathogen-derived products and epithelial MHCII/HLA-DR expression analyzed via flow cytometry. Representative histograms with select treatments are shown. The murine cytokines were run in triplicate and are representative of  $n = 2$  experiments, while the murine TLR ligands are duplicates. The human samples were run in duplicate and are representative of  $n = 2$  independent experiments. \*  $p < 0.05$  and \*\*\*\*  $p < 0.0001$  by one-way ANOVA. Il-12rb1/2= IL-12 receptor beta 1/2, IL18R1= IL18 receptor 1, IL18Rap= IL18 receptor accessory protein, gMFI=geometric mean fluorescent intensity, IFN $\gamma$ R1/2= IFN $\gamma$  receptors 1/2, Unt=untreated.

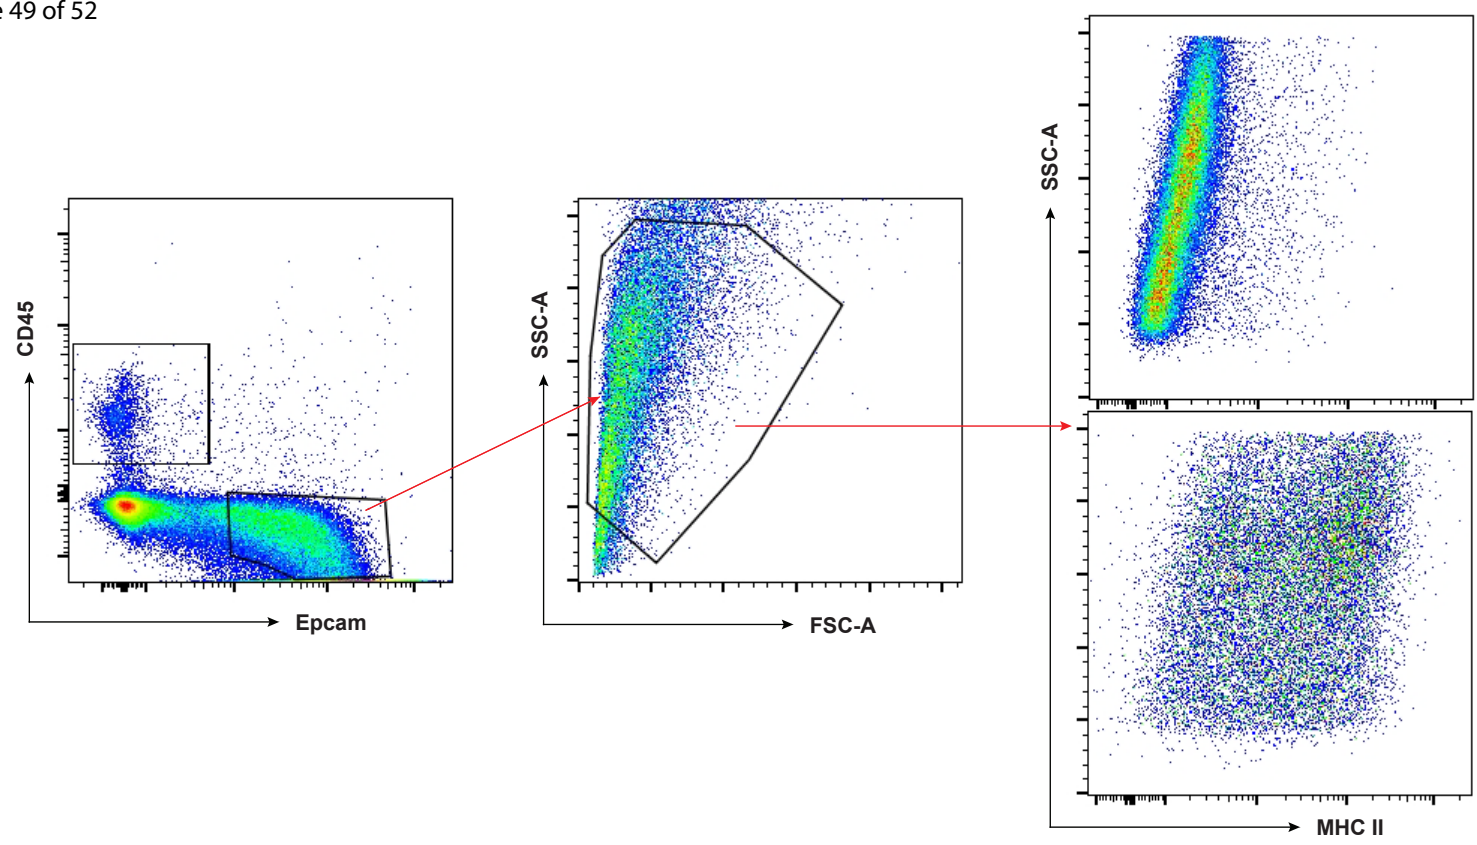

**Supplemental Figure 6: IEC identification from colonic intestinal epithelial scrapes.** Gating of the colonic intestinal epithelium in Flow Jo showing MHCII high vs MHCII low mice.

**Supplemental Table 1:** TLR ligand and PAMP stimuli sources and concentrations used in Supplemental Figure 5.

| Compound                                              | Source                                    | Treatment Dose            |
|-------------------------------------------------------|-------------------------------------------|---------------------------|
| Pam3CSK4                                              | Invivogen                                 | 1ug/ml                    |
| Zymozan                                               | Invivogen                                 | 10ug/ml                   |
| Polyinosinic: polycytidylic acid (Poly I:C)           | Sigma                                     | 100ug/ml                  |
| Lipopolysaccharide (LPS)                              | Sigma                                     | 1 ug/ml                   |
| Flagellin from <i>Salmonella typhimurium</i> (Fla-ST) | Invivogen                                 | 0.1ug/ml                  |
| Resiquimod (R848)                                     | Invivogen                                 | 10ug/ml                   |
| CpG-B 1826                                            | IDT                                       | 1ug/ml                    |
| CpG-C                                                 | Invivogen                                 | 1uM/ml                    |
| Muramyl dipeptide (MDP)                               | Invivogen                                 | 10ug/ml                   |
| Curdlan-AL                                            | Sigma                                     | 100ug/ml                  |
| Heat Killed Candida                                   | Sarah Gaffen University of Pittsburgh [*] | 1:100 Dilution from Stock |
| dA:dT                                                 | Invivogen                                 | 400ng/ml                  |

\*

\* Hernandez-Santos, N. et al. Th17 cells confer long-term adaptive immunity to oral mucosal *Candida albicans* infections. *Mucosal Immunol* 6, 900-910 (2013).

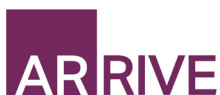

# The ARRIVE guidelines 2.0: author checklist

## The ARRIVE Essential 10

These items are the basic minimum to include in a manuscript. Without this information, readers and reviewers cannot assess the reliability of the findings.

| Item                                    | Recommendation                                                                                                                                                                                                                                                                                                                                                                                                                                                                                                                                                                                 | Section/line number, or reason for not reporting |
|-----------------------------------------|------------------------------------------------------------------------------------------------------------------------------------------------------------------------------------------------------------------------------------------------------------------------------------------------------------------------------------------------------------------------------------------------------------------------------------------------------------------------------------------------------------------------------------------------------------------------------------------------|--------------------------------------------------|
| <b>Study design</b>                     | 1 For each experiment, provide brief details of study design including: <ol style="list-style-type: none"> <li>The groups being compared, including control groups. If no control group has been used, the rationale should be stated.</li> <li>The experimental unit (e.g. a single animal, litter, or cage of animals).</li> </ol>                                                                                                                                                                                                                                                           |                                                  |
| <b>Sample size</b>                      | 2 <ol style="list-style-type: none"> <li>Specify the exact number of experimental units allocated to each group, and the total number in each experiment. Also indicate the total number of animals used.</li> <li>Explain how the sample size was decided. Provide details of any <i>a priori</i> sample size calculation, if done.</li> </ol>                                                                                                                                                                                                                                                |                                                  |
| <b>Inclusion and exclusion criteria</b> | 3 <ol style="list-style-type: none"> <li>Describe any criteria used for including and excluding animals (or experimental units) during the experiment, and data points during the analysis. Specify if these criteria were established <i>a priori</i>. If no criteria were set, state this explicitly.</li> <li>For each experimental group, report any animals, experimental units or data points not included in the analysis and explain why. If there were no exclusions, state so.</li> <li>For each analysis, report the exact value of <i>n</i> in each experimental group.</li> </ol> |                                                  |
| <b>Randomisation</b>                    | 4 <ol style="list-style-type: none"> <li>State whether randomisation was used to allocate experimental units to control and treatment groups. If done, provide the method used to generate the randomisation sequence.</li> <li>Describe the strategy used to minimise potential confounders such as the order of treatments and measurements, or animal/cage location. If confounders were not controlled, state this explicitly.</li> </ol>                                                                                                                                                  |                                                  |
| <b>Blinding</b>                         | 5 Describe who was aware of the group allocation at the different stages of the experiment (during the allocation, the conduct of the experiment, the outcome assessment, and the data analysis).                                                                                                                                                                                                                                                                                                                                                                                              |                                                  |
| <b>Outcome measures</b>                 | 6 <ol style="list-style-type: none"> <li>Clearly define all outcome measures assessed (e.g. cell death, molecular markers, or behavioural changes).</li> <li>For hypothesis-testing studies, specify the primary outcome measure, i.e. the outcome measure that was used to determine the sample size.</li> </ol>                                                                                                                                                                                                                                                                              |                                                  |
| <b>Statistical methods</b>              | 7 <ol style="list-style-type: none"> <li>Provide details of the statistical methods used for each analysis, including software used.</li> <li>Describe any methods used to assess whether the data met the assumptions of the statistical approach, and what was done if the assumptions were not met.</li> </ol>                                                                                                                                                                                                                                                                              |                                                  |
| <b>Experimental animals</b>             | 8 <ol style="list-style-type: none"> <li>Provide species-appropriate details of the animals used, including species, strain and substrain, sex, age or developmental stage, and, if relevant, weight.</li> <li>Provide further relevant information on the provenance of animals, health/immune status, genetic modification status, genotype, and any previous procedures.</li> </ol>                                                                                                                                                                                                         |                                                  |
| <b>Experimental procedures</b>          | 9 For each experimental group, including controls, describe the procedures in enough detail to allow others to replicate them, including: <ol style="list-style-type: none"> <li>What was done, how it was done and what was used.</li> <li>When and how often.</li> <li>Where (including detail of any acclimatisation periods).</li> <li>Why (provide rationale for procedures).</li> </ol>                                                                                                                                                                                                  |                                                  |
| <b>Results</b>                          | 10 For each experiment conducted, including independent replications, report: <ol style="list-style-type: none"> <li>Summary/descriptive statistics for each experimental group, with a measure of variability where applicable (e.g. mean and SD, or median and range).</li> <li>If applicable, the effect size with a confidence interval.</li> </ol>                                                                                                                                                                                                                                        |                                                  |



## The Recommended Set

These items complement the Essential 10 and add important context to the study. Reporting the items in both sets represents best practice.

| Item                                           | Recommendation                                                                                                                                                                                                                                                                                                                                                      | Section/line number, or reason for not reporting |
|------------------------------------------------|---------------------------------------------------------------------------------------------------------------------------------------------------------------------------------------------------------------------------------------------------------------------------------------------------------------------------------------------------------------------|--------------------------------------------------|
| <b>Abstract</b>                                | 11 Provide an accurate summary of the research objectives, animal species, strain and sex, key methods, principal findings, and study conclusions.                                                                                                                                                                                                                  |                                                  |
| <b>Background</b>                              | 12 a. Include sufficient scientific background to understand the rationale and context for the study, and explain the experimental approach.<br>b. Explain how the animal species and model used address the scientific objectives and, where appropriate, the relevance to human biology.                                                                          |                                                  |
| <b>Objectives</b>                              | 13 Clearly describe the research question, research objectives and, where appropriate, specific hypotheses being tested.                                                                                                                                                                                                                                            |                                                  |
| <b>Ethical statement</b>                       | 14 Provide the name of the ethical review committee or equivalent that has approved the use of animals in this study, and any relevant licence or protocol numbers (if applicable). If ethical approval was not sought or granted, provide a justification.                                                                                                         |                                                  |
| <b>Housing and husbandry</b>                   | 15 Provide details of housing and husbandry conditions, including any environmental enrichment.                                                                                                                                                                                                                                                                     |                                                  |
| <b>Animal care and monitoring</b>              | 16 a. Describe any interventions or steps taken in the experimental protocols to reduce pain, suffering and distress.<br>b. Report any expected or unexpected adverse events.<br>c. Describe the humane endpoints established for the study, the signs that were monitored and the frequency of monitoring. If the study did not have humane endpoints, state this. |                                                  |
| <b>Interpretation/ scientific implications</b> | 17 a. Interpret the results, taking into account the study objectives and hypotheses, current theory and other relevant studies in the literature.<br>b. Comment on the study limitations including potential sources of bias, limitations of the animal model, and imprecision associated with the results.                                                        |                                                  |
| <b>Generalisability/ translation</b>           | 18 Comment on whether, and how, the findings of this study are likely to generalise to other species or experimental conditions, including any relevance to human biology (where appropriate).                                                                                                                                                                      |                                                  |
| <b>Protocol registration</b>                   | 19 Provide a statement indicating whether a protocol (including the research question, key design features, and analysis plan) was prepared before the study, and if and where this protocol was registered.                                                                                                                                                        |                                                  |
| <b>Data access</b>                             | 20 Provide a statement describing if and where study data are available.                                                                                                                                                                                                                                                                                            |                                                  |
| <b>Declaration of interests</b>                | 21 a. Declare any potential conflicts of interest, including financial and non-financial. If none exist, this should be stated.<br>b. List all funding sources (including grant identifier) and the role of the funder(s) in the design, analysis and reporting of the study.                                                                                       |                                                  |
